# Supplementary material
Source: Springer Nature journal article supplement (https://www.springermedizin.de/resource/supplementary/12968_2013_3341_MOESM4_ESM.pdf/9583666)

Expected Time Course of the Cardiac Signal

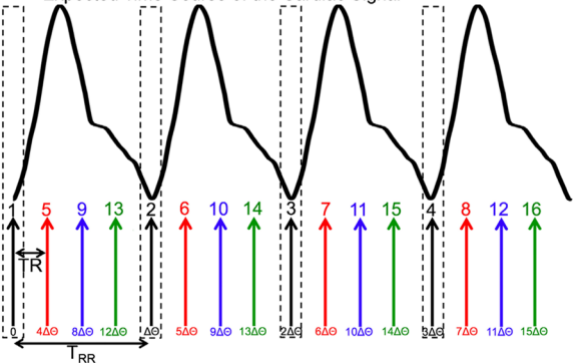

Supplement: MOESM4 [file 9583666]
